# Supplementary material for: Predicting Response to Anthracyclines in Ovarian Cancer
Source: Int J Environ Res Public Health. 2022 Apr 2;19(7):4260. doi: 10.3390/ijerph19074260 (PMC8998349; doi:10.3390/ijerph19074260)
Supplement: Supplementary file 1 [file ijerph-19-04260-s001.zip › ijerph-1632866-supplementary.pdf]

**Table S1.** Summary of the main findings.

|                                                                             |                                                                                                                                                                                                                                                                                                                                                                                                                                                                                                                                                               |                                                                                                                                                                                                        |
|-----------------------------------------------------------------------------|---------------------------------------------------------------------------------------------------------------------------------------------------------------------------------------------------------------------------------------------------------------------------------------------------------------------------------------------------------------------------------------------------------------------------------------------------------------------------------------------------------------------------------------------------------------|--------------------------------------------------------------------------------------------------------------------------------------------------------------------------------------------------------|
| <b>Treatment line and platinum free-interval</b>                            | <p>FIRST LINE SETTING</p> <ol style="list-style-type: none"> <li>1. No difference in PFS or OS between carboplatin/PLD and carboplatin/paclitaxel in first-line treatment</li> <li>2. No survival benefit in adding PLD to carboplatin/paclitaxel, but more hematological toxicity</li> </ol> <p>RECURRENCE SETTING</p> <ol style="list-style-type: none"> <li>1. Comparable or better efficacy of anthracyclines over carboplatin/paclitaxel in recurrent disease</li> <li>2. PLD plus trabectedin is associated with improved PFS over PLD alone</li> </ol> | <p><i>Lawrie TA et al, 2013</i><br/> <i>Pignata S et al, 2011</i><br/> <i>Pujade-Lauraine E et al, 2010</i><br/> <i>Colombo N et al, 2020</i><br/> <i>Monk BJ et al, 2010</i></p>                      |
| <b>BRCA 1-2 status and response to anthracyclines</b>                       | <p>BRCA mutated OC is more responsive to the group of DNA damaging drugs (i.e. PLD) and more resistant to antimicrotubule agents in comparison with sporadic tumors</p>                                                                                                                                                                                                                                                                                                                                                                                       | <p><i>Safra T et al, 2011</i><br/> <i>Venkitaraman AR, 2009</i><br/> <i>Kaye SB et al, 2012</i><br/> <i>Adams SF et al, 2011</i><br/> <i>Hollis RL et al, 2018</i><br/> <i>Monk BJ et al, 2020</i></p> |
| <b>Patients' clinical characteristics and sensitivity to anthracyclines</b> | <ol style="list-style-type: none"> <li>1. Carboplatin/PLD combination provides better therapeutic response with similar PFS and less toxicity and grade <math>\geq 2</math> allergic reactions than carboplatin/paclitaxel in women &gt; 70y</li> <li>2. PLD gives less hypersensitivity than carboplatin and paclitaxel</li> <li>3. The severity of hand-foot syndrome and mucositis may be a predictive marker of PLD efficacy</li> </ol>                                                                                                                   | <p><i>Kurtz JE et al, 2011</i><br/> <i>Joly F et al, 2011</i></p>                                                                                                                                      |
| <b>CA125 kinetics during treatment with anthracyclines</b>                  | <p>CA125 marker is not a good surrogate for treatment benefit with anthracyclines and its variations may not be faithful to the real efficacy of the ongoing treatment (usual later decline than with carboplatin-paclitaxel)</p>                                                                                                                                                                                                                                                                                                                             | <p><i>Oaknin A et al, 2010</i><br/> <i>Lee CK et al, 2011</i></p>                                                                                                                                      |
| <b>Anthracyclines and ovarian cancer histology</b>                          | <p>When compared to papillary serous, mucinous, endometrioid and clear cell tumors are significantly less resistant to doxorubicin and benefit most from incorporation of anthracyclines in treatment regimes</p>                                                                                                                                                                                                                                                                                                                                             | <p><i>Cloven N, 2004</i><br/> <i>Shimizu Y et al, 1998</i></p>                                                                                                                                         |
| <b>Gene expression and immunochemical parameters</b>                        | <ol style="list-style-type: none"> <li>1. Her-2 neu expression levels are associated with response to anthracyclines</li> <li>2. TOP2A expression by immunohistochemistry is a predictive marker of response to PLD-based therapy in relapsed platinum resistant or partially platinum-sensitive OC</li> </ol>                                                                                                                                                                                                                                                | <p><i>Cloven N et al, 2003</i><br/> <i>Ghisoni E et al, 2019</i></p>                                                                                                                                   |
| <b>TP53 mutation and resistance to anthracyclines</b>                       | <p>Increase in mutant p53 levels linked to anthracyclines treatment seems to impair their antitumor effect</p>                                                                                                                                                                                                                                                                                                                                                                                                                                                | <p><i>Bush JA et al, 2002</i><br/> <i>Chrisanthar R et al, 2008</i></p>                                                                                                                                |
| <b>Immune system expression and anthracyclines</b>                          | <ol style="list-style-type: none"> <li>1. Relevant immunogenic potential of anthracyclines that may enhance immunogenic cell death by downregulating PDL-1</li> <li>2. PLD seems to enhance the immune response in BRCA 1-deficient tumors</li> </ol>                                                                                                                                                                                                                                                                                                         | <p><i>Casares N et al, 2005</i><br/> <i>Mantia-Smaldone G et al, 2014</i></p>                                                                                                                          |
| <b>MiRNAs</b>                                                               | <p>Different miRNAs were found to be associated with doxorubicin-response and can help to predict response</p>                                                                                                                                                                                                                                                                                                                                                                                                                                                | <p><i>Boren T et al, 2009</i></p>                                                                                                                                                                      |
| <b>Organoids</b>                                                            | <p>Microscopic, three-dimensional structures grown from stem cells can reproduce key features of</p>                                                                                                                                                                                                                                                                                                                                                                                                                                                          | <p><i>Maenhoudt N et al, 2020</i></p>                                                                                                                                                                  |

|  |                                                                                    |  |
|--|------------------------------------------------------------------------------------|--|
|  | patients' tumor characteristics and test chemotherapy<br>response for each patient |  |
|--|------------------------------------------------------------------------------------|--|
